# Supplementary material
Source: PubMed Central journal article supplement (PMC3555098)
Supplement: Supp_Fig1.pdf [file Supp_Fig1.pdf]

## Supplementary Data

U-2 OS w/o cytostatics

|   | Subset Name | Count | Freq. of Parent |
|---|-------------|-------|-----------------|
| ■ | G2          | 5340  | 22,91           |
| ■ | S           | 1169  | 5,02            |
| ■ | G1          | 16787 | 72,03           |

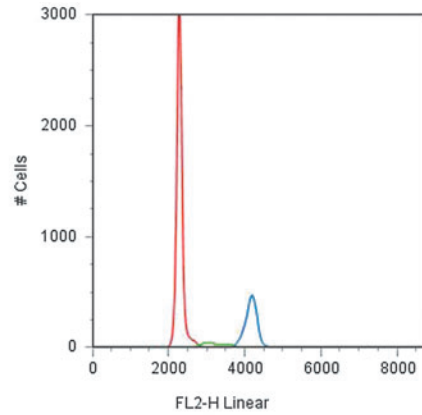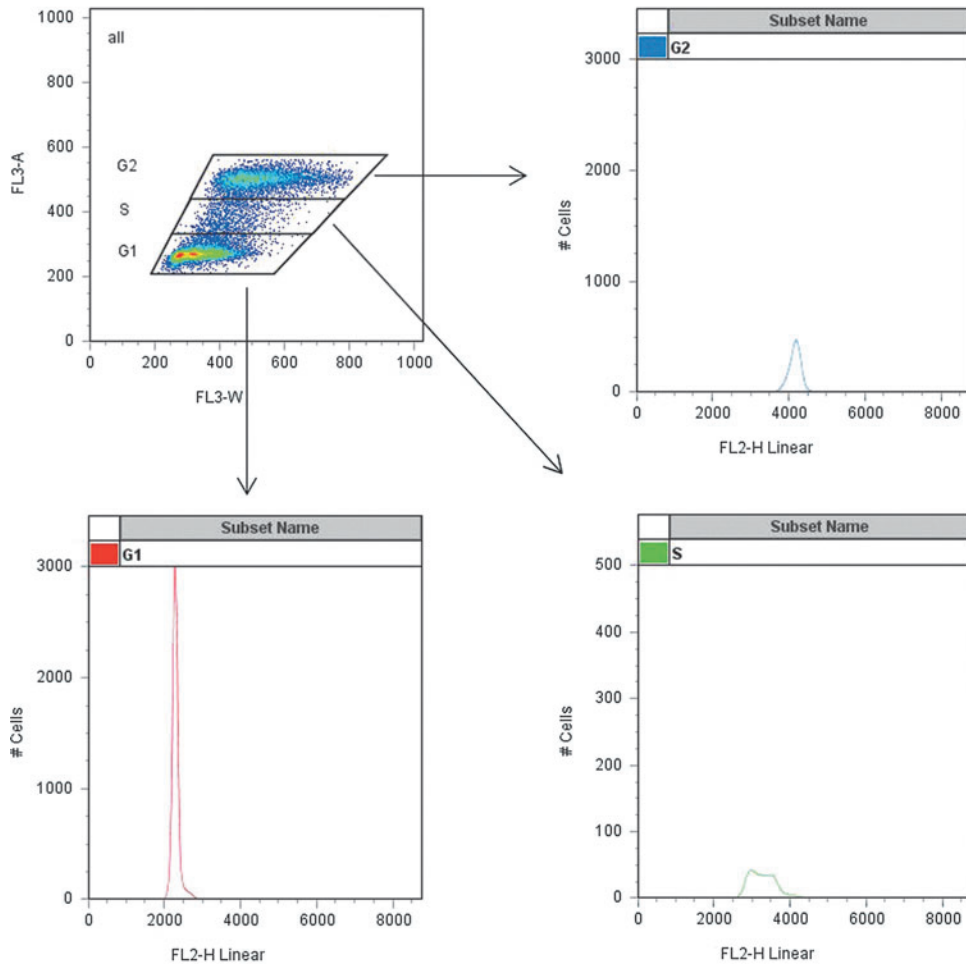

**SUPPLEMENTARY FIG. S1.** Analysis of cell-cycle profile. Cells were synchronized by serum starvation for one day before incubation with cytostatic drugs. At 24 h and 48 h after treatment, cells were fixed in ethanol, stained with propidium iodide, and analyzed by flow cytometry. The percentage of cells in G1, S, and G2/M phase was determined by plotting cells as FL3-W versus FL3-A. Correct gate setting was verified by plotting respective cell populations as FL2-H versus cell counts. Overlay of the three populations yields a typical cell-cycle profile (top right panel). Analysis is shown exemplarily for untreated U-2 OS cells.
