# Supplementary material
Source: PubMed Central journal article supplement (PMC3555098)
Supplement: Supp_Fig2.pdf [file Supp_Fig2.pdf]

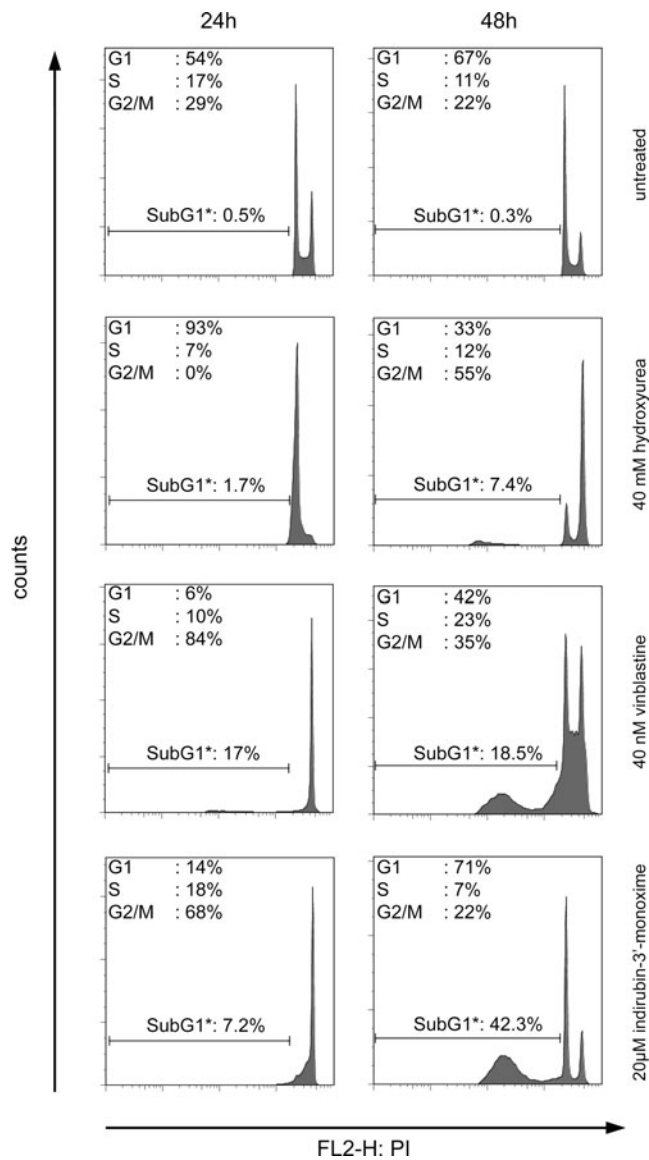

**SUPPLEMENTARY FIG. S2.** Drug-induced cell-cycle arrest and apoptosis. Target cells were synchronized by serum starvation for one day before incubation with cytostatic drugs. At 24 h and 48 h after treatment, cells were fixed in ethanol, stained with propidium iodide, and analyzed by flow cytometry. The percentage of cells in G1, S, and G2/M phase was determined by plotting FL3-W versus FL3-A (see Supplementary Fig. S1). The subG1 fraction was determined by plotting the whole cell population as FL2-H versus cell counts and is indicated as percentage of the whole cell population. Analysis is shown exemplarily for HeLa cells treated with hydroxyurea, vinblastine, and indirubin-3'-monoxime.
