# Supplementary material
Source: PubMed Central journal article supplement (PMC3555098)
Supplement: Supp_Fig4.pdf [file Supp_Fig4.pdf]

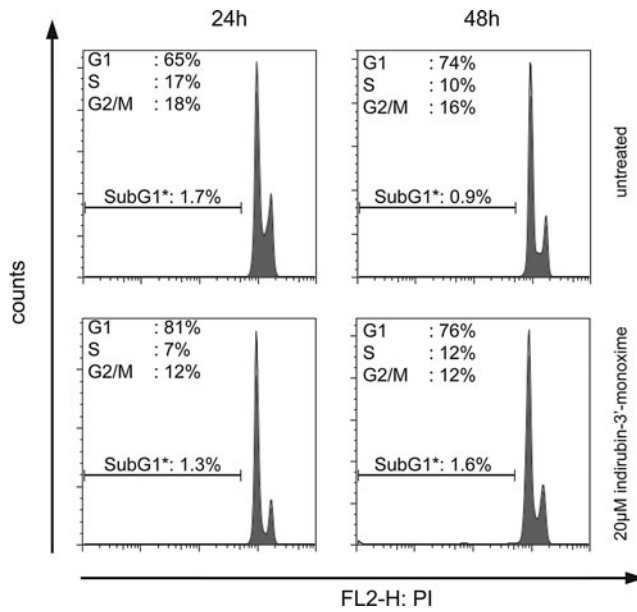

**SUPPLEMENTARY FIG. S4.** Drug-induced apoptosis in UC-MSC. Target cells were synchronized by serum starvation for one day before incubation with cytostatic drugs. At 24 h and 48 h after treatment, cells were fixed in ethanol, stained with propidium iodide, and analyzed by flow cytometry. The subG1 fraction was determined by plotting the whole cell population as FL2-H versus cell counts and is indicated as percentage of the whole cell population. Analysis is shown exemplarily for one sample of UC-MSC ( $N=3$ ) treated with 20  $\mu\text{m}$  indirubin-3'-monoxime as compared to nontreated cells. The percentage of the G1, S, and G2 populations are the mean values of Figure 6b.
