# Supplementary material
Source: PubMed Central journal article supplement (PMC3555098)
Supplement: Supp_Fig5.pdf [file Supp_Fig5.pdf]

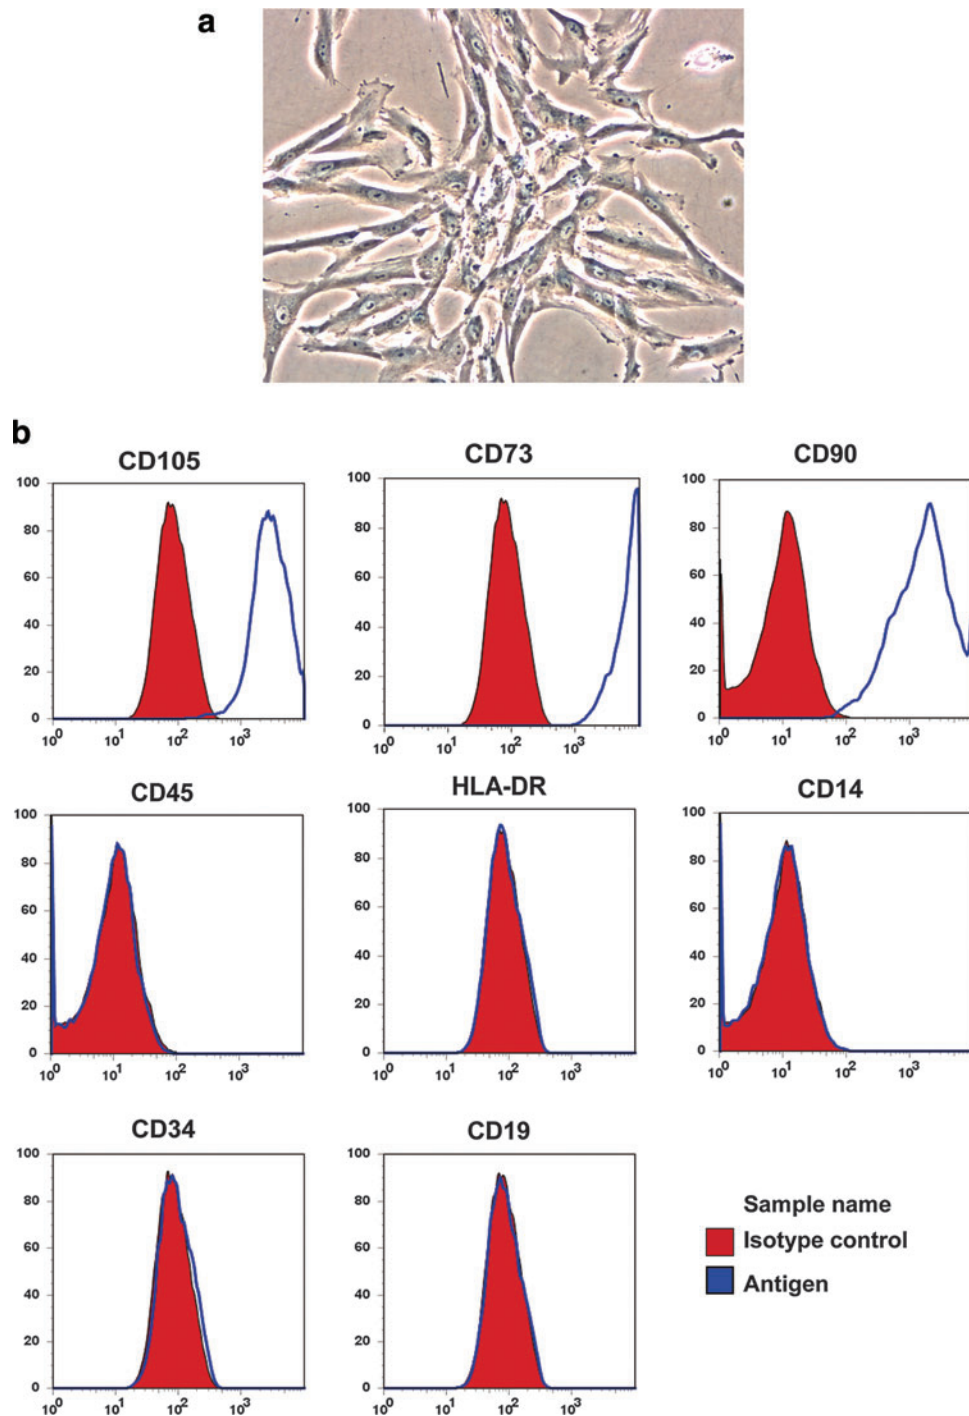

**SUPPLEMENTARY FIG. S5.** Morphology and phenotype of UC-MSC. **(a)** Microscopic picture of UC-MSC. The bright-field image was acquired with Olympus camera U-IV1X-2 connected to the Olympus CKX41 light microscope. Magnification 100x. **(b)** Surface antigen profiles of UC-MSC. After AAV/ZFN-mediated gene targeting in the presence or absence of indirubin-3'-monoxime, cells were expanded and subjected to phenotypic marker analysis. Staining for markers characteristic for MSC (CD105-PE, CD73-PE, CD90-APC) or HSC (CD45-APC, HLA-DR-PE, CD14-APC, CD34-PE, CD19-PE) revealed typical MSC phenotype. Cells were collected using EPICS XL/MCL flow cytometer (Becton Coulter GmbH) and analyzed with FlowJo software. No differences in the antigens expression profiles between the groups could be detected. Representative histograms are shown.
